# Supplementary material for: Circularly polarized room-temperature phosphorescence enhanced by dynamic cross-linked network fixation
Source: Royal Society of Chemistry journal article supplement (doi:10.1039/d4nj00510d), 2024-01-01
Supplement: d4nj00510d1.pdf [file d4nj00510d1.pdf]

## Supporting Information

### Circularly polarized Room-Temperature Phosphorescence enhanced by dynamic cross-linked networks fixation

#### Experimental Section

**Materials and instruments:** All reagents were purchased from Energy Chemical, Pepto-Bismol Biochemical or Macklin Biochemical Co., Ltd depending on the supply availability and used without further purification.  $^1\text{H}$  NMR spectra was recorded on a AVANCE III 500 BRUKER instrument. High-resolution mass spectra were measured by America Thermo Scientific Q Exactive Focus. Fluorescence spectra were measured using a F-280 fluorescence spectrophotometer in darkness and under ambient conditions. Phosphorescence spectra were measured by a Hitachi F-4600 fluorescence spectrophotometer in the dark and under ambient conditions. Phosphorescence lifetime, fluorescence quantum yield and phosphorescence quantum yield were measured by the Edinburgh Instruments FLS-980 or Edinburgh Instruments FLS-1000 photoluminescence spectrometer in darkness and under ambient conditions. Differential scanning calorimetry curves were obtained by TA Instruments DSC25 in an argon atmosphere. Photos were taken by Canon 6D2.

#### Computational methods

The DFT and TDDFT calculations were performed using Gaussian16<sub>1</sub> at the PBE0<sub>2</sub>/6-311g(d,p)<sub>3</sub> level with the D3(BJ) empirical dispersion correction<sub>4</sub>.

#### Characterizations

BAD:  $^1\text{H}$  NMR (500 MHz, Chloroform-*d*)  $\delta$  8.75 (s, 2H), 8.11 (s, 2H), 7.94 (s, 2H), 7.71 (s, 2H), 7.47 (s, 2H), 7.32 (s, 2H), 7.09 (s, 2H), 5.03 (s, 2H), 1.29 (d,  $J = 11.0$  Hz, 12H).

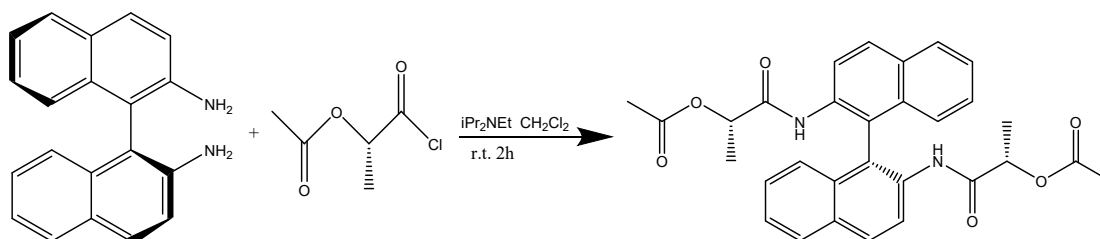

Figure S1 Synthesis step of S/SBAD

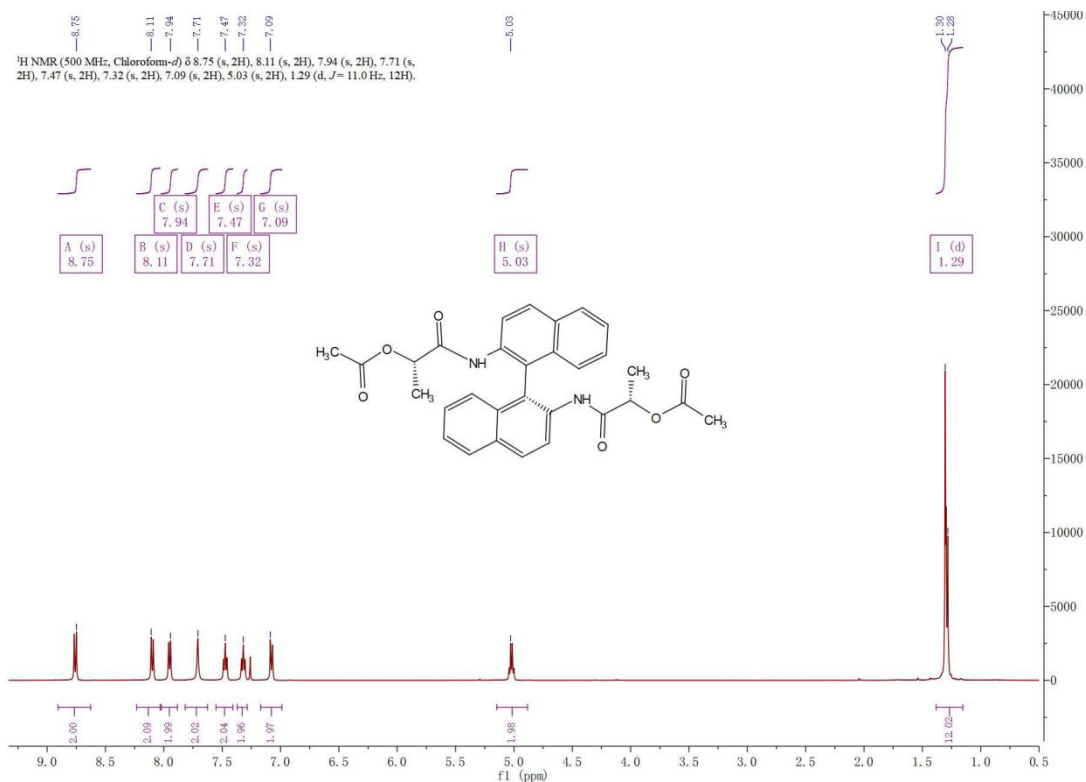

Figure S2 <sup>1</sup>H-NMR spectrum of S/SBAD in Trichloromethane-d<sub>6</sub>

2308061467-21 #16-33 RT: 0.09-0.17 AV: 9 SB: 60 0.26-0.90 NL: 1.82E9  
T: FTMS + p ESI Full ms [50.0000-750.0000]

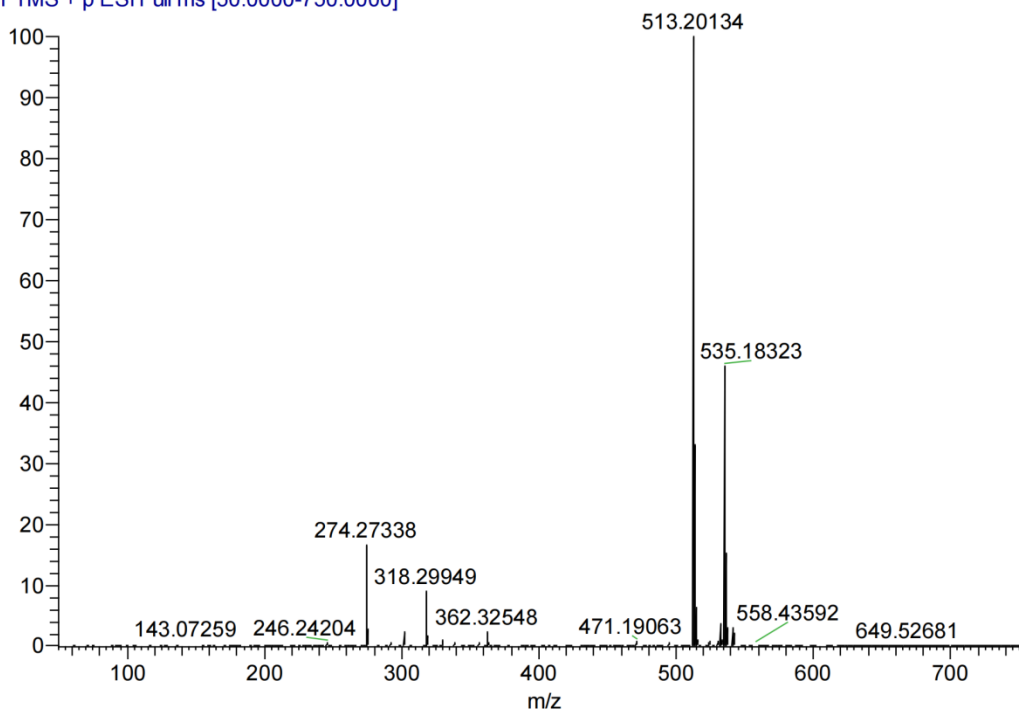

Figure S3 HRMS-MALDI of S/SBAD

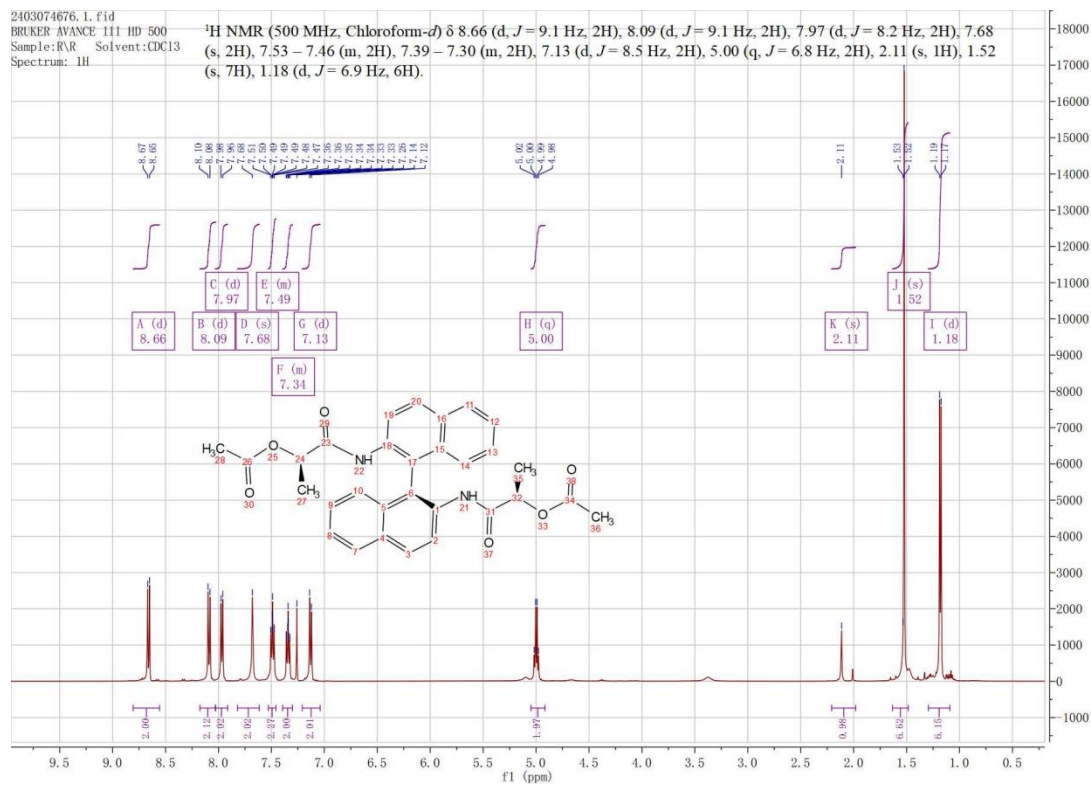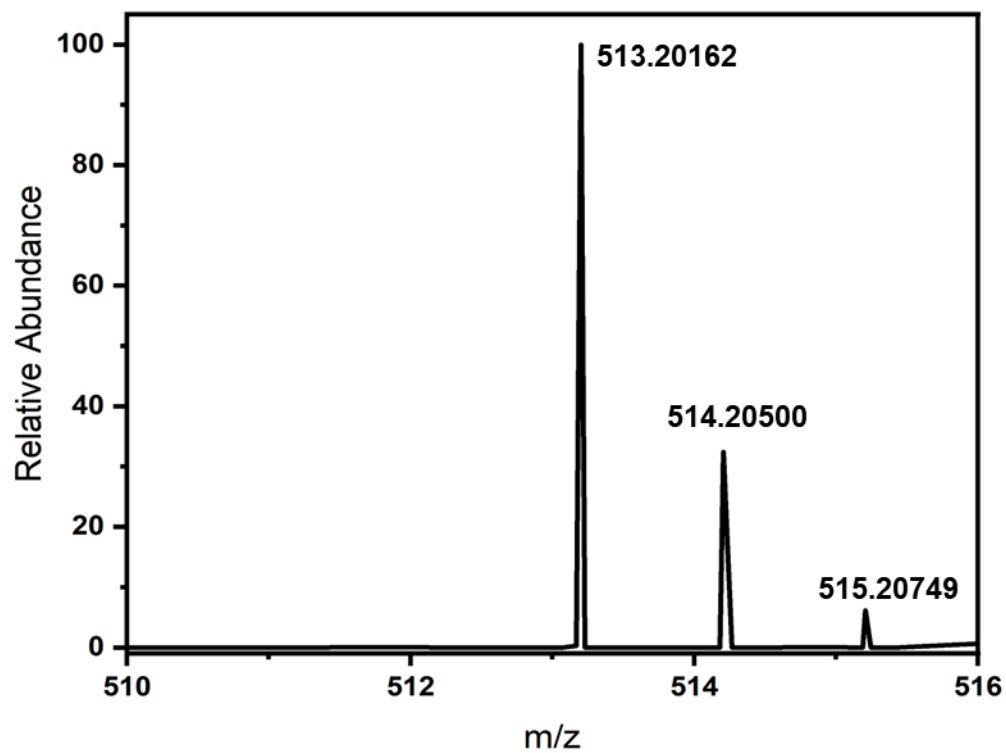

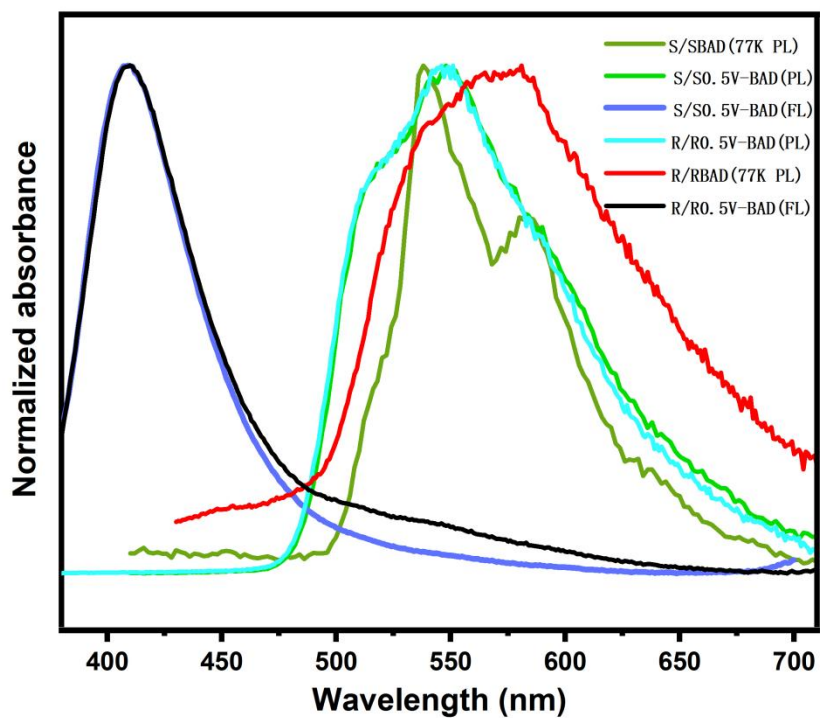

Figure S6 luminescent performance of S/SBAD and R/RBAD for comparison

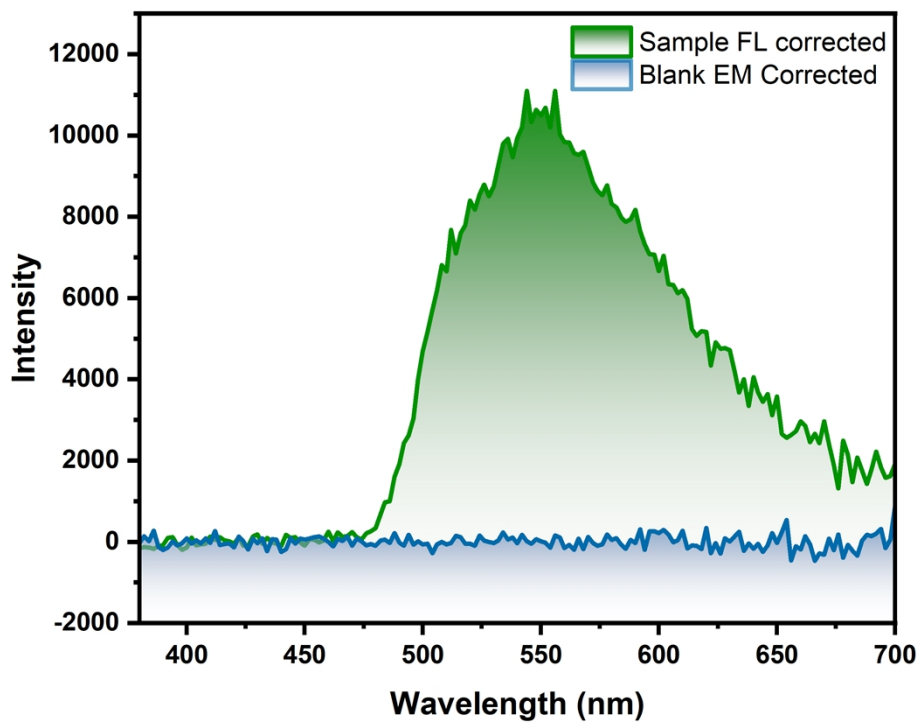

Figure S7 Emission and Fluorescence figure

Table S1 Quantum yield data (Excitation Wavelength 350.04~380 nm, Emission Wavelength 380~700 nm)

| Excitation<br>Params<br>(nm) | Emission<br>Params<br>(nm) | Quantum<br>Yield(%) | Chromaticit<br>y X | Chromaticit<br>y Y | Chromaticit<br>y u' | Chromaticit<br>y v' |
|------------------------------|----------------------------|---------------------|--------------------|--------------------|---------------------|---------------------|
| 350.04                       | 380                        | 9.69669             | 0.40028            | 0.55875            | 0.17981             | 0.56475             |

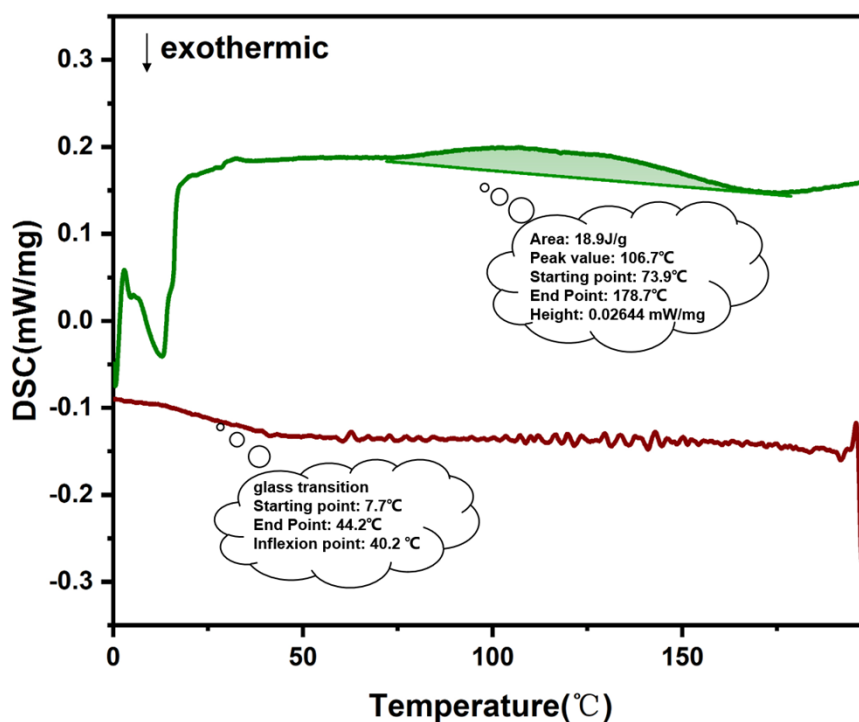

Figure S8 DSC of S/S0.5V-BAD
